# Supplementary material for: Treatment of Anti-HLA Donor-Specific Antibodies Results in Increased Infectious Complications and Impairs Survival after Liver Transplantation
Source: MDPI journal article supplement (doi:10.3390/jcm9123986), 2020-12-09
Supplement: s1 [file s1]

# Treatment of Anti-HLA Donor-Specific Antibodies Results in Increased Infectious Complications and Impairs Survival after Liver Transplantation

Sinem Ünlü <sup>1,2</sup>, Nils Lachmann <sup>2</sup>, Maximilian Jara <sup>1</sup>, Paul Viktor Ritschl <sup>1,3</sup>, Leke Wiering <sup>1</sup>, Dennis Eurich <sup>1</sup>, Christian Denecke <sup>1</sup>, Matthias Biebl <sup>1</sup>, Sascha Chopra <sup>1</sup>, Safak Gül-Klein <sup>1</sup>, Wenzel Schöning <sup>1</sup>, Moritz Schmelzle <sup>1</sup>, Petra Reinke <sup>4</sup>, Frank Tacke <sup>5</sup>, Johann Pratschke <sup>1</sup>, Robert Öllinger <sup>1</sup> and Tomasz Dziudzio <sup>1,\*</sup>

## SUPPLEMENTARY TABLES

**Table S1.** DSA characteristics of 113 DSA-positive patients who underwent LT from deceased donors between 1 January 2008 and 31 December 2015.

|                      | Total<br>( <i>n</i> = 113) |        | preformed<br>DSA<br>( <i>n</i> = 49) |        | de novo DSA<br>( <i>n</i> = 55) |        | <i>p</i> -<br>value <sup>a</sup> | both<br>preformed<br>and de novo<br>DSA ( <i>n</i> = 9) |        | <i>p</i> -<br>value <sup>b</sup> | <i>p</i> -<br>value <sup>c</sup> |
|----------------------|----------------------------|--------|--------------------------------------|--------|---------------------------------|--------|----------------------------------|---------------------------------------------------------|--------|----------------------------------|----------------------------------|
| <b>DSA<br/>class</b> |                            |        |                                      |        |                                 |        |                                  |                                                         |        |                                  |                                  |
| I                    | 47                         | (41.6) | 32                                   | (65.3) | 14                              | (25.5) | <b>&lt;0.001</b>                 | 0                                                       | (0.0)  | <b>&lt;0.001</b>                 | 0.087                            |
| II                   | 35                         | (31.0) | 5                                    | (10.2) | 28                              | (50.9) | <b>&lt;0.001</b>                 | 2                                                       | (22.2) | 0.309                            | 0.110                            |
| I and II             | 31                         | (27.4) | 12                                   | (24.5) | 13                              | (23.6) | 0.919                            | 7                                                       | (77.8) | <b>0.002</b>                     | <b>0.001</b>                     |
| <b>DSA<br/>count</b> |                            |        |                                      |        |                                 |        |                                  |                                                         |        |                                  |                                  |
| I                    | 1                          | (1–3)  | 1                                    | (1–3)  | 1                               | (1–2)  | 0.555                            | 4                                                       | (3–5)  | <b>&lt;0.001</b>                 | <b>&lt;0.001</b>                 |
| II                   | 1                          | (0–2)  | 1                                    | (1–2)  | 1                               | (0–1)  | <b>&lt;0.001</b>                 | 2                                                       | (1–3)  | 0.577                            | <b>0.029</b>                     |
| II                   | 1                          | (0–1)  | 0                                    | (0–1)  | 1                               | (0–1)  | <b>&lt;0.001</b>                 | 2                                                       | (1–4)  | <b>&lt;0.001</b>                 | <b>0.003</b>                     |

Annotations: Data presented as *n* (%) or median and Interquartile range (Q1–Q3). <sup>a</sup> Comparison of organ recipients with preformed vs. de novo DSA <sup>b</sup> Comparison with organ recipients with exclusively preformed DSA. <sup>c</sup> Comparison with organ recipients with exclusively de novo DSA. Abbreviations: DSA: Donor-Specific anti-HLA Antibodies, LT: Liver Transplantation.
